# Supplementary material for: Toxicity Profiles of Fractionated Radiotherapy, Contemporary Stereotactic Radiosurgery, and Transsphenoidal Surgery in Nonfunctioning Pituitary Macroadenomas
Source: MDPI journal article supplement (doi:10.3390/cancers11111658), 2019-10-26
Supplement: s1 [file s1]

# Supplementary Materials: Toxicity Profiles of Fractionated Radiotherapy, Contemporary Stereotactic Radiosurgery, and Transsphenoidal Surgery in Nonfunctioning Pituitary Macroadenomas

Chia-Lun Chang, Kevin Sheng-Po Yuan, Alexander T.H. Wu and Szu-Yuan Wu

Strokes, conventional radiotherapy vs. Stereotactic radiosurgery

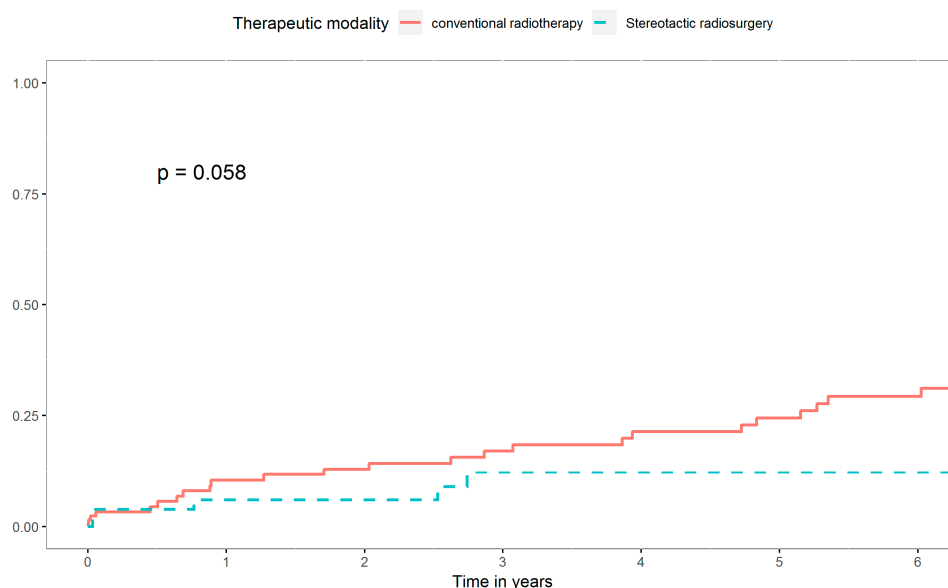

**Figure S1.** Kaplan–Meier curves for stroke risk in patients with nonfunctioning pituitary macroadenomas who received stereotactic radiosurgery and those who received fractionated radiotherapy.

Strokes, conventional radiotherapy vs. Curative surgery

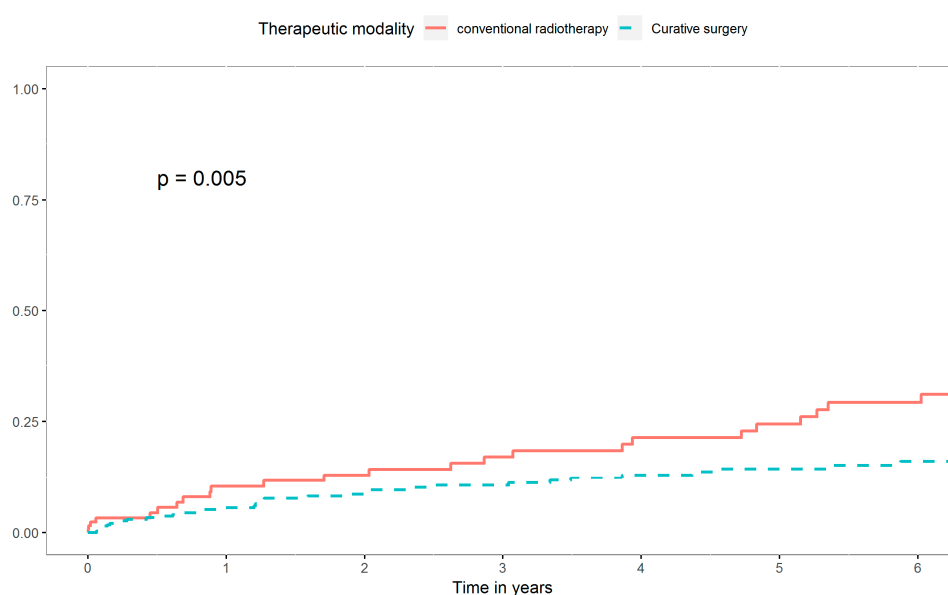

**Figure S2.** Kaplan–Meier curves for stroke risk in patients with nonfunctioning pituitary macroadenomas who received transsphenoidal surgery and those who received fractionated radiotherapy.

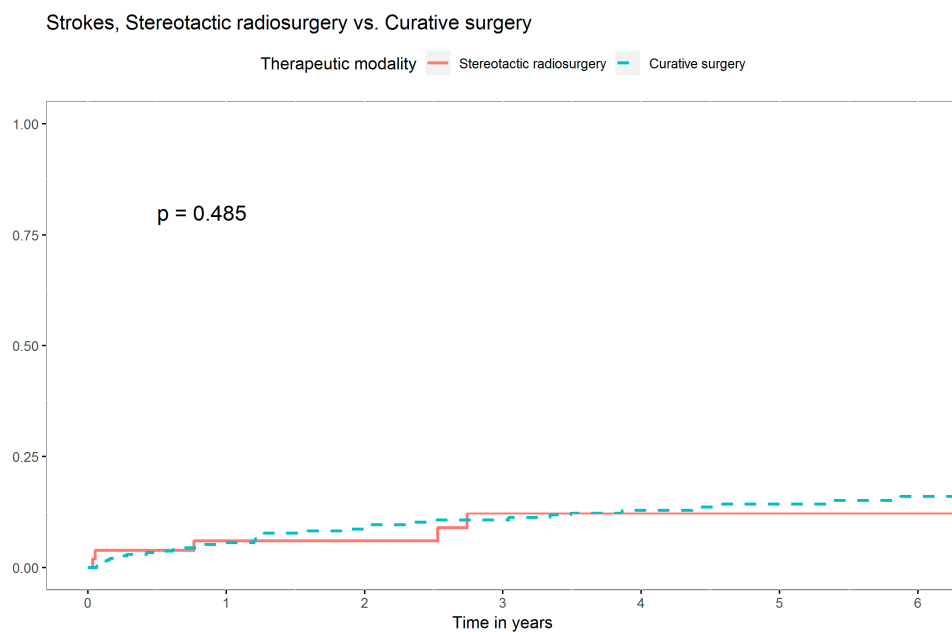

**Figure S3.** Kaplan–Meier curves for stroke risk in patients with nonfunctioning pituitary macroadenomas who received transsphenoidal surgery and those who received stereotactic radiosurgery.

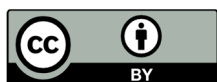

© 2019 by the authors. Licensee MDPI, Basel, Switzerland. This article is an open access article distributed under the terms and conditions of the Creative Commons Attribution (CC BY) license (<http://creativecommons.org/licenses/by/4.0/>).
